# Supplementary material
Source: Springer Nature journal article supplement (https://www.springermedizin.de/resource/supplementary/12885_2014_4860_MOESM1_ESM.pdf/9467514)
Supplement: MOESM1 [file 9467514]

1 **Additional files**

2 **Table A1.** The sequences of primers used for PCR and sequencing analysis of *TP53* exons.

| Region                           | Sequences of primers       |                             |
|----------------------------------|----------------------------|-----------------------------|
|                                  | Forward                    | Reverse                     |
| <b>Polymerase chain reaction</b> |                            |                             |
| <b>Exons 2-3</b>                 | 5'-atccccacttttctcttgc-3'  | 5'-gaaaagagcagtcagaggac-3'  |
| <b>Exon 4</b>                    | 5'-cctctgactgctcttttacc-3' | 5'-tcatggaagccagcccctcag-3' |
| <b>Exon 5</b>                    | 5'-ttccacacccccgcccggca-3' | 5'-acctgggcaaccagccctg-3'   |
| <b>Exon 6</b>                    | 5'-acagggctggttcccagg-3'   | 5'-agtgcaaaccagacctcag-3'   |
| <b>Exon 7</b>                    | 5'-actggcctcatcttggcct-3'  | 5'-gtcagaggcaagcagaggct-3'  |
| <b>Exon 8</b>                    | 5'-taaatgggacaggtaggacc-3' | 5'-tccaccgcttctgtcctgc-3'   |
| <b>cDNA exons 4-8</b>            | 5'-gagccgagtcagatcctag-3'  | 5'-gcagtgctcgcttagtgctc-3'  |
| <b>Sequencing analysis</b>       |                            |                             |
| <b>Exons 2-3</b>                 | 5'-tcttgagcagccagact-3'    | 5'-agagcagtcagaggaccag-3'   |
| <b>Exon 4</b>                    | 5'-ccatctacagtcccccttgc-3' | 5'-caacttgggacaggagtcag-3'  |
| <b>Exon 5</b>                    | 5'-caagcagtcacagcacatga-3' | 5'-aaccagccctgtcgtctct-3'   |
| <b>Exon 6</b>                    | 5'-caggcctctgattcctact-3'  | 5'-agacctcaggggctcatag-3'   |
| <b>Exon 7</b>                    | 5'-atctcctaggttgctctga-3'  | 5'-tggcaagtggctcctgacct-3'  |
| <b>Exon 8</b>                    | 5'-ctctttcctatcctgagta-3'  | 5'-ctgcttcttaccctgctta-3'   |
| <b>cDNA exons 4-8</b>            | 5'-ccctctgagtcaggaaacat-3' | 5'-cccttcttgcggagattct-3'   |

3

4 **Table A2.** The primer sequences used for *TP53* intron 3 sequencing.

| Region          | PCR Primer                                                      | Sequencing Primer                                            |
|-----------------|-----------------------------------------------------------------|--------------------------------------------------------------|
| <b>Intron 3</b> | FV 5'-atccccacttttctcttgc-3'<br>REV 5'-tcatggaagccagcccctcag-3' | FV 5'-tcttgagcagccagact-3'<br>REV 5'-caacttgggacaggagtcag-3' |

5

6 **Table A3.** Sequences of primers used during PIN3 and codon 72 bacterial subcloning  
7 procedure.

| Type of reaction                 | Sequences of primers       |                                      |
|----------------------------------|----------------------------|--------------------------------------|
| <b>Cloning</b>                   | BamHI restriction enzyme   | 5'-gcaagatccatgggactgactttctgctc-3'  |
|                                  | HindIII restriction enzyme | 5'-cctggaagcttttctgggaaggacagaaga-3' |
| <b>Polymerase chain reaction</b> | Forward                    | 5'-taaacgacggccagtgaat-3'            |
|                                  | Reverse                    | 5'-caggaaacagctatgacctga-3'          |
| <b>Sequencing analysis</b>       | Forward                    | 5'-gactgactttctgcttctgt-3'           |
|                                  | Reverse                    | 5'-gctatgacctgattacgcc-3'            |

8 **Table A4.** Results from dual luciferase reporter assays.

| <b>Normalized Firefly luciferase activity</b>                        |                  |                                                                             |                   |
|----------------------------------------------------------------------|------------------|-----------------------------------------------------------------------------|-------------------|
| <b>Cell line</b>                                                     | <b>Construct</b> | <b>Normalized luciferase activity</b>                                       | <b>Mean value</b> |
| AD293                                                                | C                | 0.265; 0.370; 0.517; 0.294; 0.288; 0.311; 0.260; 0.232; 0.254; 0.128; 0.195 | 0.283             |
|                                                                      | A1               | 0.481; 0.467; 0.669; 0.350; 0.432; 0.405; 0.306; 0.315; 0.285; 0.150; 0.267 | 0.375             |
|                                                                      | A2               | 0.544; 0.561; 0.773; 0.385; 0.476; 0.446; 0.344; 0.332; 0.317; 0.189; 0.365 | 0.430             |
| SW962                                                                | C                | 0.023; 0.036; 0.036; 0.044; 0.037; 0.045; 0.044; 0.037                      | 0.038             |
|                                                                      | A1               | 0.022; 0.047; 0.035; 0.040; 0.042; 0.036; 0.034; 0.038                      | 0.037             |
|                                                                      | A2               | 0.038; 0.082; 0.056; 0.053; 0.077; 0.054; 0.048; 0.060                      | 0.059             |
| <b>Normalized luciferase activity in reference to control sample</b> |                  |                                                                             |                   |
| <b>Cell line</b>                                                     | <b>Ratio</b>     | <b>Ratio value</b>                                                          | <b>Mean value</b> |
| AD293                                                                | A1/C             | 1.82; 1.26; 1.29; 1.19; 1.50; 1.30; 1.18; 1.36; 1.12; 1.17; 1.37            | 1.32              |
|                                                                      | A2/C             | 2.05; 1.52; 1.50; 1.31; 1.65; 1.43; 1.32; 1.43; 1.25; 1.48; 1.87            | 1.53              |
|                                                                      | A2/A1            | 1.13; 1.20; 1.16; 1.10; 1.10; 1.10; 1.12; 1.05; 1.11; 1.26; 1.37            | 1.16              |
| SW962                                                                | A1/C             | 0.96; 1.31; 0.97; 0.91; 1.14; 0.80; 0.77; 1.03                              | 0.98              |
|                                                                      | A2/C             | 1.65; 2.28; 1.56; 1.20; 2.08; 1.20; 1.09; 1.62                              | 1.59              |
|                                                                      | A2/A1            | 1.73; 1.74; 1.60; 1.33; 1.83; 1.50; 1.41; 1.58                              | 1.59              |
| <b>Results of statistical analysis</b>                               |                  |                                                                             |                   |
| <b>Cell line</b>                                                     | <b>Ratio</b>     | <b>p value</b>                                                              |                   |
| AD293                                                                | A1 vs. C         | 0.05566                                                                     |                   |
|                                                                      | A2 vs. C         | 0.00833                                                                     |                   |
|                                                                      | A1 vs. A2        | 0.33164                                                                     |                   |
|                                                                      | A1/C vs. A2/C    | 0.01923                                                                     |                   |
| SW962                                                                | A1 vs. C         | 0.64538                                                                     |                   |
|                                                                      | A2 vs. C         | 0.00109                                                                     |                   |
|                                                                      | A1 vs. A2        | 0.00109                                                                     |                   |
|                                                                      | A1/C vs. A2/C    | 0.00186                                                                     |                   |
| Total                                                                | A1/C vs. A2/C    | 0.00019                                                                     |                   |

9

10

11 **Table A5.** Intron 3 sequence from *TP53* gene, potentially capable of forming G-quadruplex  
 12 structure [9].

|                           |                                                                                                                       |
|---------------------------|-----------------------------------------------------------------------------------------------------------------------|
| <i>TP53</i> intron 3 (A1) | GTAAGGACAAGGGTTGGGCTGGGGACCTGGAGGGCTGGGG<br>GGCTGGGGGGCTGAGGACCTGGTCCTCTGACTGCTCTTTTC<br>ACCCATCTACAG                 |
| <i>TP53</i> intron 3 (A2) | GTAAGGACAAGGGTTGGGCTGGGGACCTGGAGGGCTGGGG<br>ACCTGGAGGGCTGGGGGGCTGGGGGGCTGAGGACCTGGTC<br>CTCTGACTGCTCTTTTCACCCATCTACAG |

13

14 **Table A6.** Summary results of *TP53* sequencing analysis from 307 samples with the distinction  
 15 for the diagnosis[2,3,19,20].

| Diagnosis                      | Samples with <i>TP53</i> mutation | Samples without <i>TP53</i> mutation | Total number of samples | % of mutated samples |
|--------------------------------|-----------------------------------|--------------------------------------|-------------------------|----------------------|
| glioma                         | 25                                | 72                                   | 97                      | 25.8%                |
| soft tissue sarcoma            | 9                                 | 85                                   | 94                      | 9.6%                 |
| colorectal cancer              | 19                                | 12                                   | 31                      | 61,3%                |
| prostate cancer                | 1                                 | 19                                   | 20                      | 5%                   |
| leukemia (AML)                 | 2                                 | 21                                   | 23                      | 8.7%                 |
| invasive breast duct carcinoma | 8                                 | 34                                   | 42                      | 19.0%                |

16

17

18

19

20

21

22

23 **Table A7.** The results of RNAfold prediction.

|                                 | Canonical structure prediction mode                                                                                                                                                          |                                                                                                                                                                                                                                                  | G-quadruplex prediction mode                                                                                                                                                                 |                                                                                                                                                                                                                                  |
|---------------------------------|----------------------------------------------------------------------------------------------------------------------------------------------------------------------------------------------|--------------------------------------------------------------------------------------------------------------------------------------------------------------------------------------------------------------------------------------------------|----------------------------------------------------------------------------------------------------------------------------------------------------------------------------------------------|----------------------------------------------------------------------------------------------------------------------------------------------------------------------------------------------------------------------------------|
|                                 | A1                                                                                                                                                                                           | A2                                                                                                                                                                                                                                               | A1                                                                                                                                                                                           | A2                                                                                                                                                                                                                               |
| Minimum free energy<br>kcal/mol | -9.60                                                                                                                                                                                        | -11.90                                                                                                                                                                                                                                           | -23.16                                                                                                                                                                                       | -25.36                                                                                                                                                                                                                           |
|                                 | <p>GTAAGGACAAGGTTGGGCTGGGACCTGGAGGCTGGGGGCTGGGGGCTGAGGACCTGGTCCTCTGACTGCTCTTTTCACCCATCTACAG</p> <p>.....(((.....))).....(((.....))).....(((.....))).....(((.....))).....(((.....))).....</p> | <p>GTAAGGACAAGGTTGGGCTGGGACCTGGAGGCTGGGGACCTGGAGGCTGGGGGCTGGGGGCTGAGGACCTGGTCCTCTGACTGCTCTTTTCACCCATCTA</p> <p>CAG</p> <p>.....(((.....))).....(((.....))).....(((.....))).....(((.....))).....(((.....))).....(((.....))).....</p> <p>.....</p> | <p>GTAAGGACAAGGTTGGGCTGGGACCTGGAGGCTGGGGGCTGGGGGCTGAGGACCTGGTCCTCTGACTGCTCTTTTCACCCATCTACAG</p> <p>.....+++.....+++.....+++.....+++.....+++.....+++.....+++.....+++.....+++.....+++.....</p> | <p>GTAAGGACAAGGTTGGGCTGGGACCTGGAGGCTGGGGACCTGGAGGCTGGGGGCTGGGGGCTGAGGACCTGGTCCTCTGACTGCTCTTTTCACCCATCTA</p> <p>CAG</p> <p>.....+++.....+++.....+++.....+++.....+++.....+++.....+++.....+++.....+++.....+++.....</p> <p>.....</p> |
